# Supplementary material for: Effects of aerosol dynamics and gas–particle conversion on dry deposition of inorganic reactive nitrogen in a temperate forest
Source: Copernicus journal article supplement (doi:10.5194/acp-20-4933-2020), 2020-04-27
Supplement: Supplementary file 1 [file acp-20-4933-2020-supplement.pdf]

Supplement of Atmos. Chem. Phys., 20, 4933–4949, 2020  
<https://doi.org/10.5194/acp-20-4933-2020-supplement>  
© Author(s) 2020. This work is distributed under  
the Creative Commons Attribution 4.0 License.

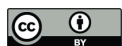

*Supplement of*

## **Effects of aerosol dynamics and gas–particle conversion on dry deposition of inorganic reactive nitrogen in a temperate forest**

**Genki Katata et al.**

*Correspondence to:* Genki Katata ([genki.katata.mirai@vc.ibaraki.ac.jp](mailto:genki.katata.mirai@vc.ibaraki.ac.jp))

The copyright of individual parts of the supplement might differ from the CC BY 4.0 License.

# 1 Supplemental Figures

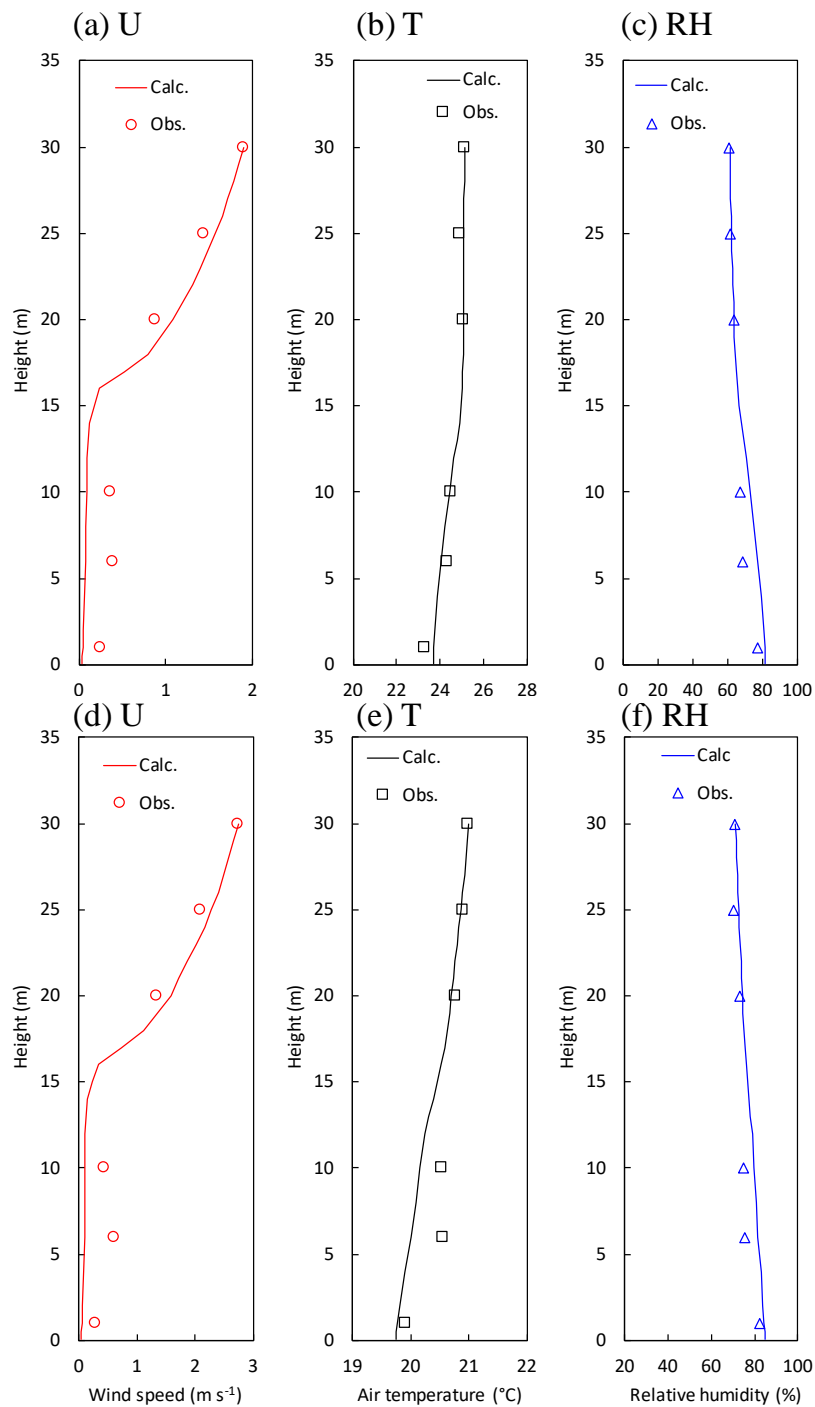

2

3 Figure S1. Mean vertical profiles in observed and calculated (a) wind speed, (b) air temperature,  
4 and (c) relative humidity in all simulation scenarios (a–c) during the daytime and (d–f)  
5 nighttime between 27 September and 11 October 2016 except for grey shaded areas in Fig. 6.

6

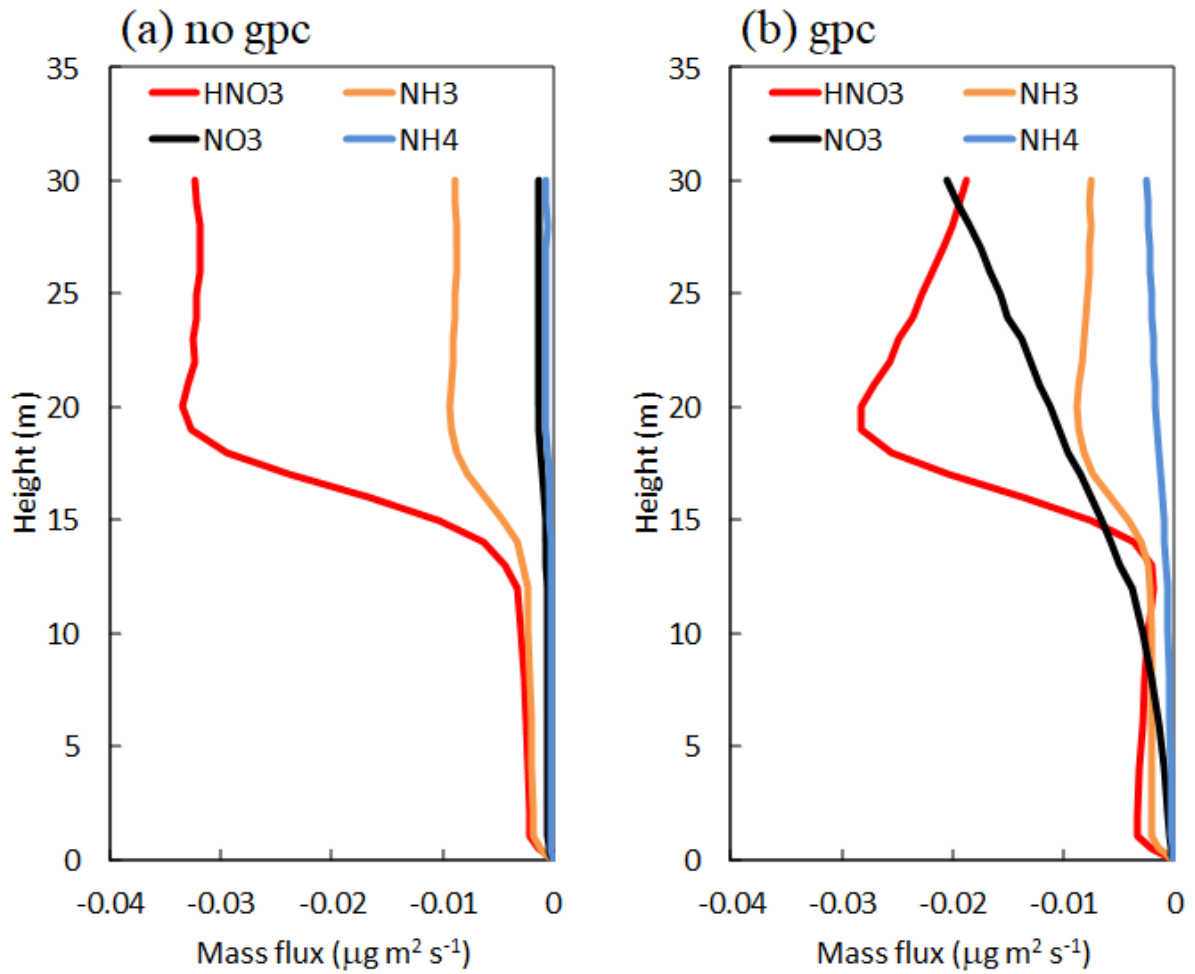

7

8 Figure S2. Mean vertical profiles in (a) calculated normalized mass flux in the "no gpc" scenario  
 9 and (b) the "gpc" scenario for HNO<sub>3</sub> and NH<sub>3</sub> gases and NO<sub>3</sub><sup>-</sup> and NH<sub>4</sub><sup>+</sup> fine particles during  
 10 the daytime between 27 September and 11 October 2016 except for grey shaded areas in Fig. 6.

11

12 **Supplemental Table**

13

14 Table S1. Summary of simulation settings for the multi-layer atmosphere–SOiL–VEGetation  
15 model, SOLVEG.

16

| Item                                           | Value                                                                                                                  |
|------------------------------------------------|------------------------------------------------------------------------------------------------------------------------|
| Simulation periods                             | Early autumn (26 September to 11 October 2016);<br>Late autumn: 7 November to 7 December                               |
| Time step                                      | 6 s                                                                                                                    |
| Vegetation species                             | Broad-leaved forest ( <i>Quercus spp.</i> )                                                                            |
| Numbers of layers                              | 29, 20, and 7 for atmosphere, vegetation, and soil, respectively                                                       |
| Soil layer boundaries                          | 0.02, 0.05, 0.1, 0.2, 0.5, 1.0, and 2.0 m depth                                                                        |
| Vegetation layer boundaries                    | 0.05, 0.1, 0.2, 0.3, and 0.5 m (understory vegetation), and from<br>1 to 20 m (forest canopy) with an increment of 1 m |
| Atmospheric layer boundaries                   | At the vegetation layers and from heights of 21 to 29 m in<br>increments of 0.1 m                                      |
| Root fraction distribution                     | Constant from the surface to 0.5 m depth                                                                               |
| Characteristics length for leaf,<br>$d_{leaf}$ | 10 mm                                                                                                                  |
| Number of particle size bins                   | 30 bins from 0.003 to 3.5 $\mu\text{m}$ in diameter                                                                    |
| Porosity (saturated water<br>content)          | 0.43 $\text{m}^3 \text{m}^{-3}$                                                                                        |
| Soil texture                                   | Loam                                                                                                                   |
| Initial soil water content                     | 0.5 $\text{m}^3 \text{m}^{-3}$                                                                                         |
| Leaf area index (LAI) of trees                 | 4.3 (early autumn) and 3.6 $\text{m}^2 \text{m}^{-3}$ (late autumn)                                                    |
| Other parameters                               | Same as Katata et al. (2014)                                                                                           |

17

18

19 **References**

20 Katata, G., Kajino, M., Matsuda, K., Takahashi, A., and Nakaya, K.: A numerical study of the  
21 effects of aerosol hygroscopic properties to dry deposition on a broad-leaved forest,  
22 Atmos. Environ., 97, 501-510, 2014.

23
